# Supplementary material
Source: publisher figshare collection journal article supplement (https://acs.figshare.com/ndownloader/files/4676965)

Figure S1. TGA trace for **1**.

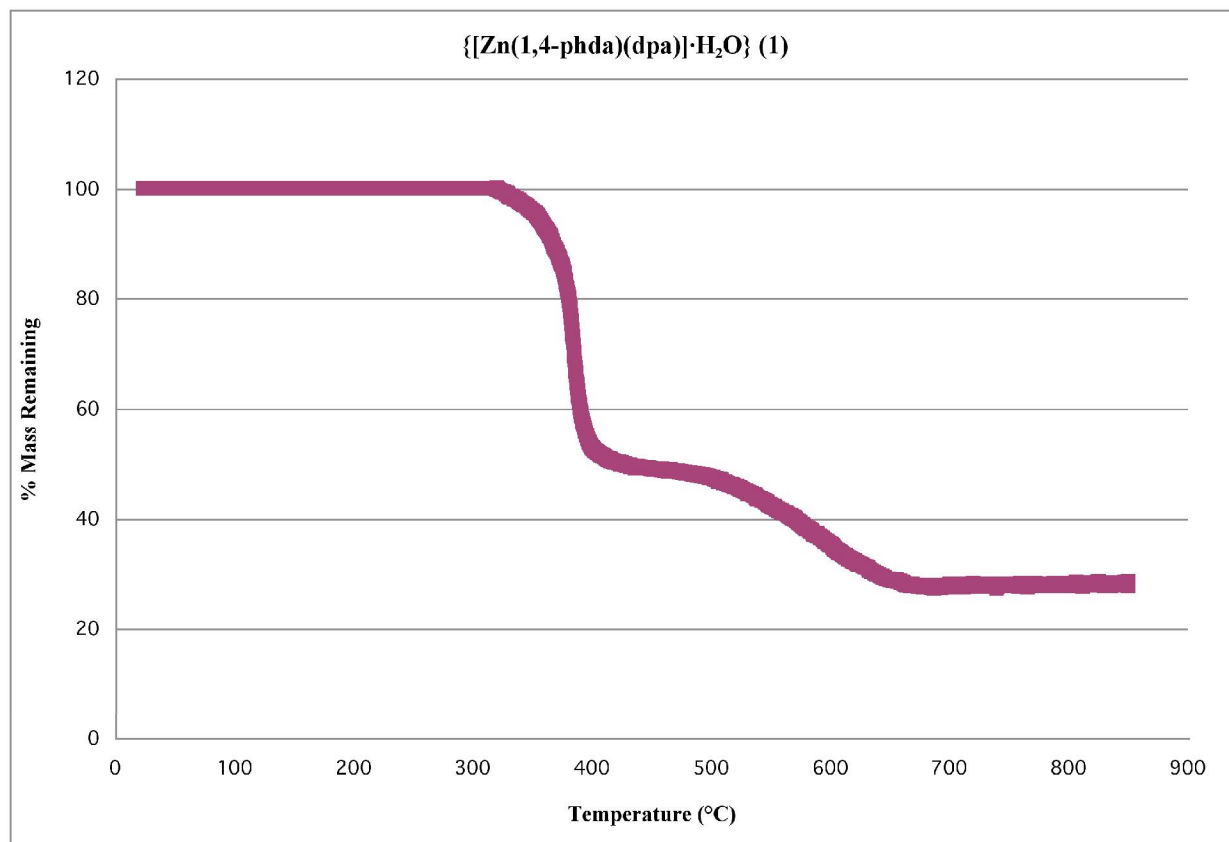

Figure S2. TGA trace for **2**.

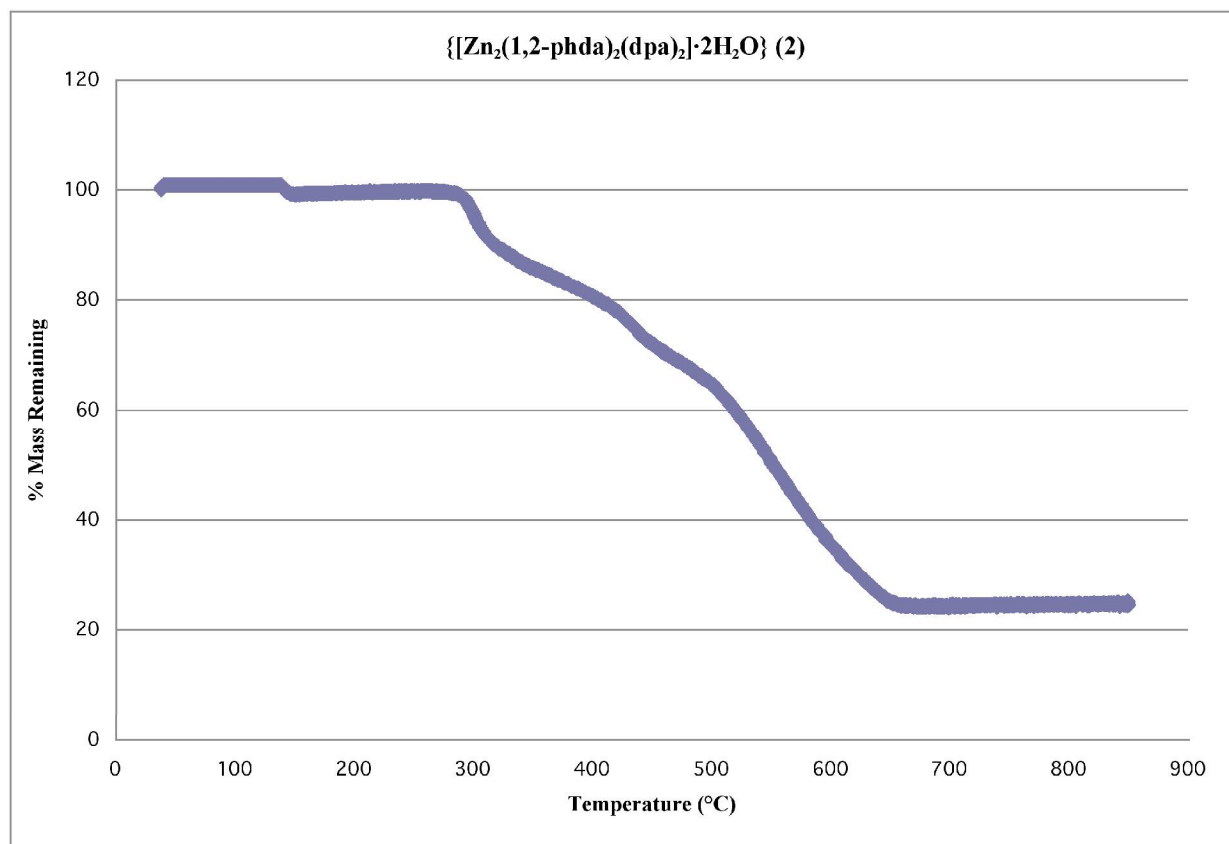

Figure S3. TGA trace for **3**.

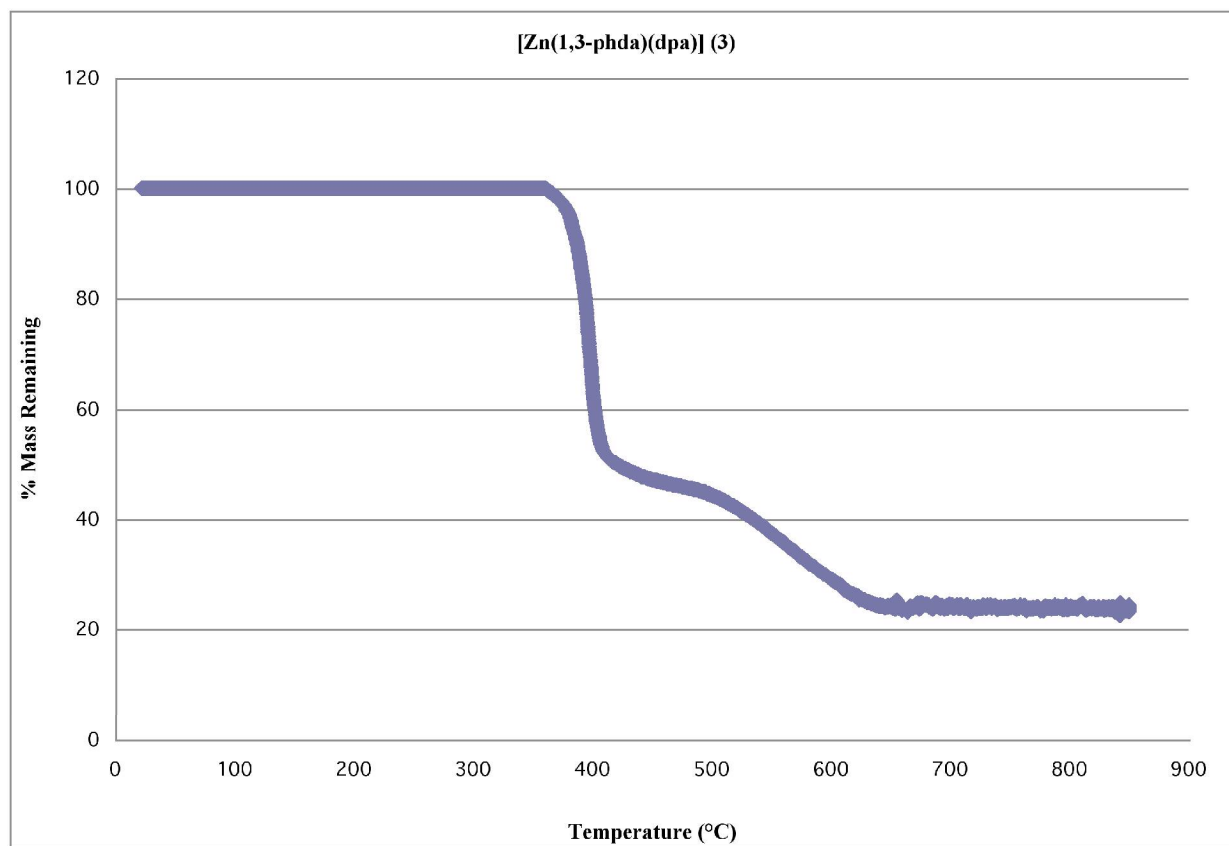

Supplement: Supplementary file 1 [file 4676965]
